# Supplementary material
Source: publisher figshare collection journal article supplement (https://acs.figshare.com/ndownloader/files/13856204)
Supplement: Supplementary file 1 [file 13856204]

## **SUPPLEMENTARY INFORMATION**

### **Blended Nanostructured Degradable Mesh with Endometrial Mesenchymal Stem Cells Promotes Tissue Integration and Anti-Inflammatory Response *in Vivo* for Pelvic Floor Application**

*Shayanti Mukherjee<sup>1, 2, 3\*</sup>, Saeedeh Darzi<sup>1</sup>, Anna Rosamilia<sup>2,4</sup>, Vinod Kadam<sup>3</sup>, Yen Truong<sup>3</sup>, Jerome A. Werkmeister<sup>1, 2, 3</sup> and Caroline E. Gargett<sup>1, 2</sup>*

<sup>1</sup>The Ritchie Centre, Hudson Institute of Medical Research, Clayton, Australia 3168

<sup>2</sup>Department of Obstetrics and Gynaecology, Monash University, Clayton Australia 3168

<sup>3</sup>CSIRO Manufacturing, Clayton, Australia 3168

<sup>4</sup>Pelvic Floor Disorders Unit, Monash Health Australia

\* Correspondance: [shayanti.mukherjee@hudson.org.au](mailto:shayanti.mukherjee@hudson.org.au)

## **Supporting Figures**

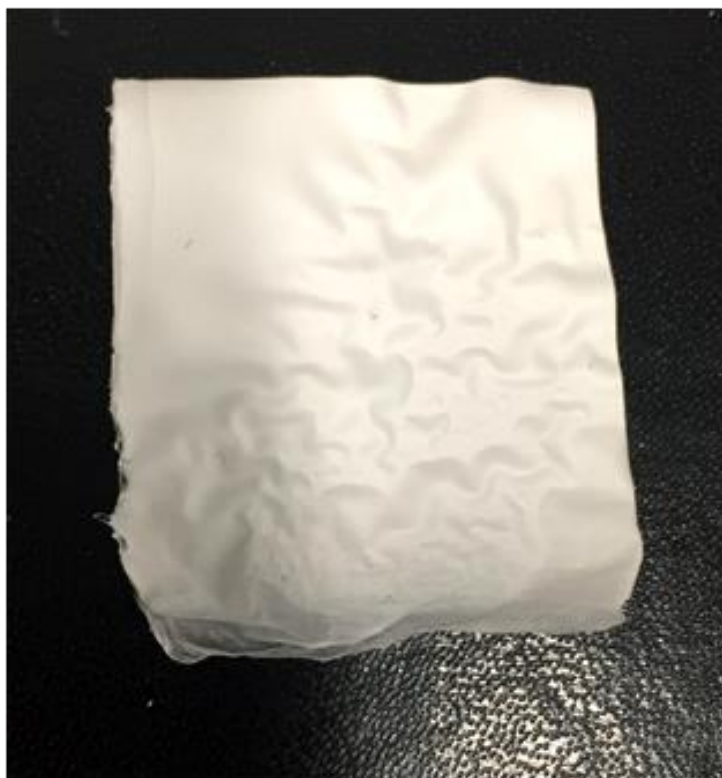

**Figure S1:** Electrospun nanofiber mesh that appear like tissue paper

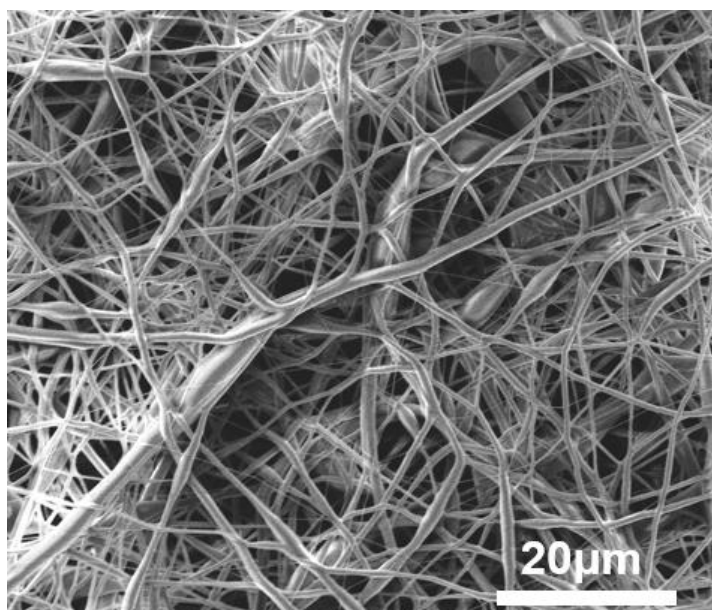

**Figure S2:** Scanning electron micrograph of beaded PLACL nanofiber mesh

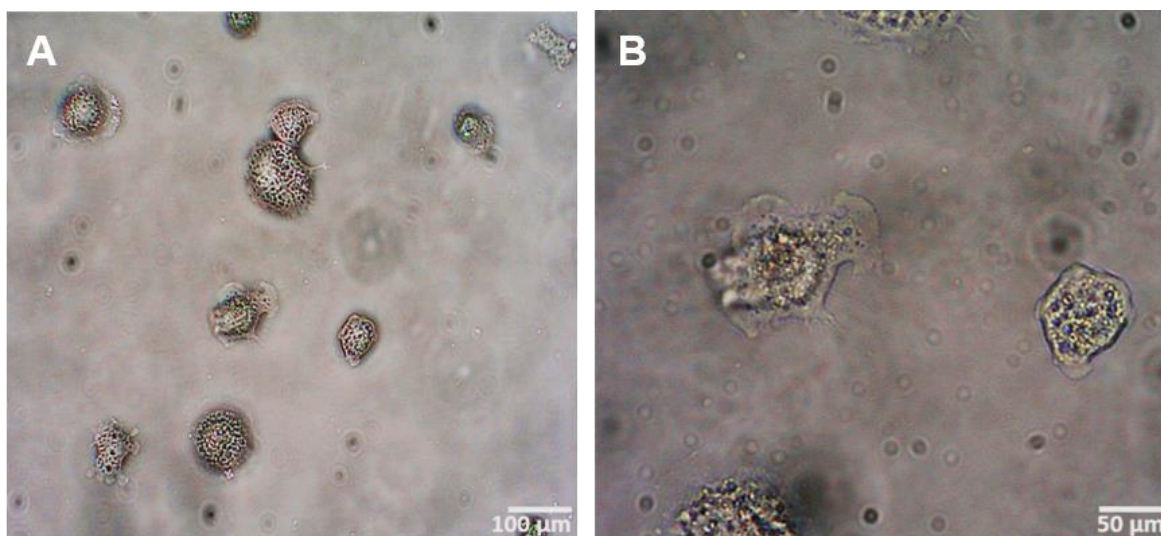

**Figure S3: Bright field images of eMSC prior to seeding on nanofibers.** Images at (A) 20x and (B) 40X show that eMSC diameter may be smaller than some top layer pores of PLACL+G in Fig 4C that leads to cellular infiltration soon after seeding

#### In vitro 3D Imaging of eMSC Penetration on PLACL+G

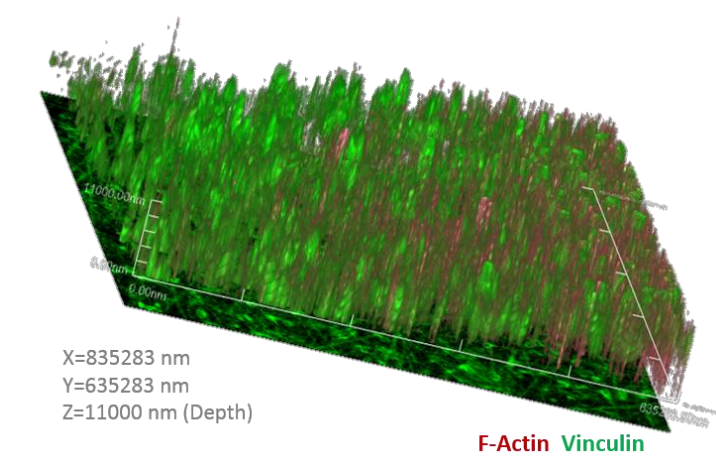

**Figure S4: Depth Measurement of eMSCs penetrating PLACL+G at 14 days** showing numerous cells (red: F-Actin and green: Vinculin) have penetrated the NF mesh

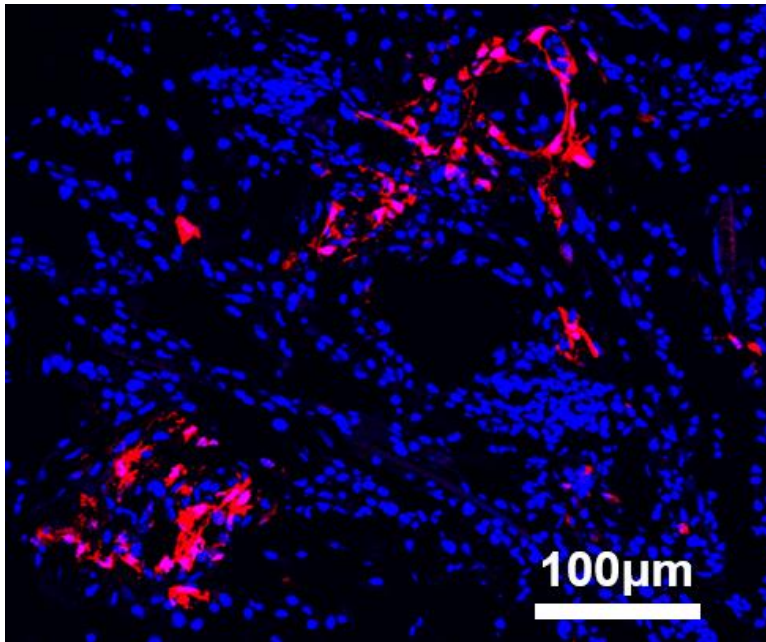

**Figure S5: Fluorescence of m-Cherry eMSCs at 1 week detected in host tissue further away from implantation site of PLACL+G.**

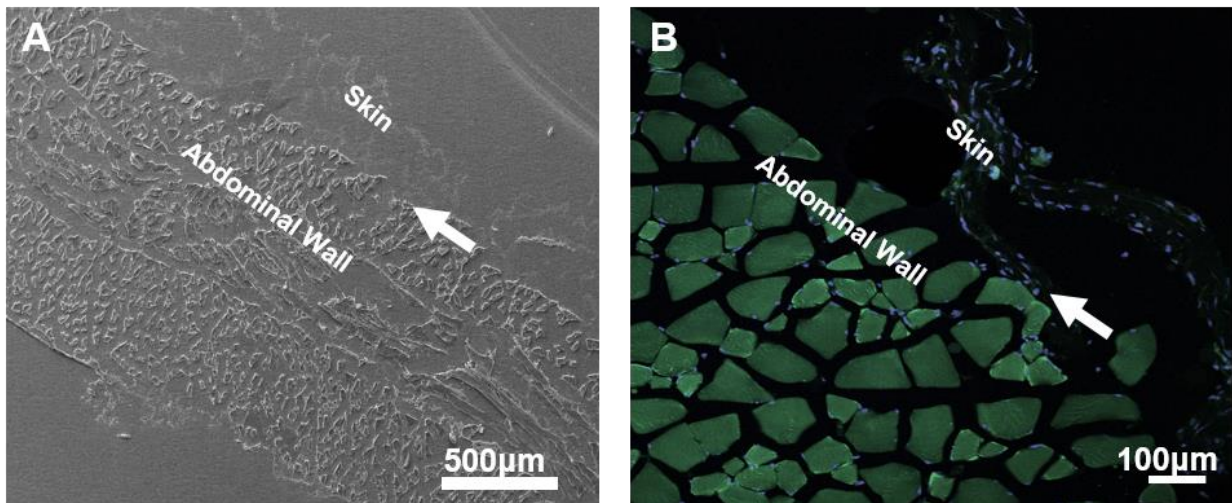

**Figure S6: Sham control show loosely packed skin abdominal wall. Mesh was inserted at between these tissues indicated by white arrow**



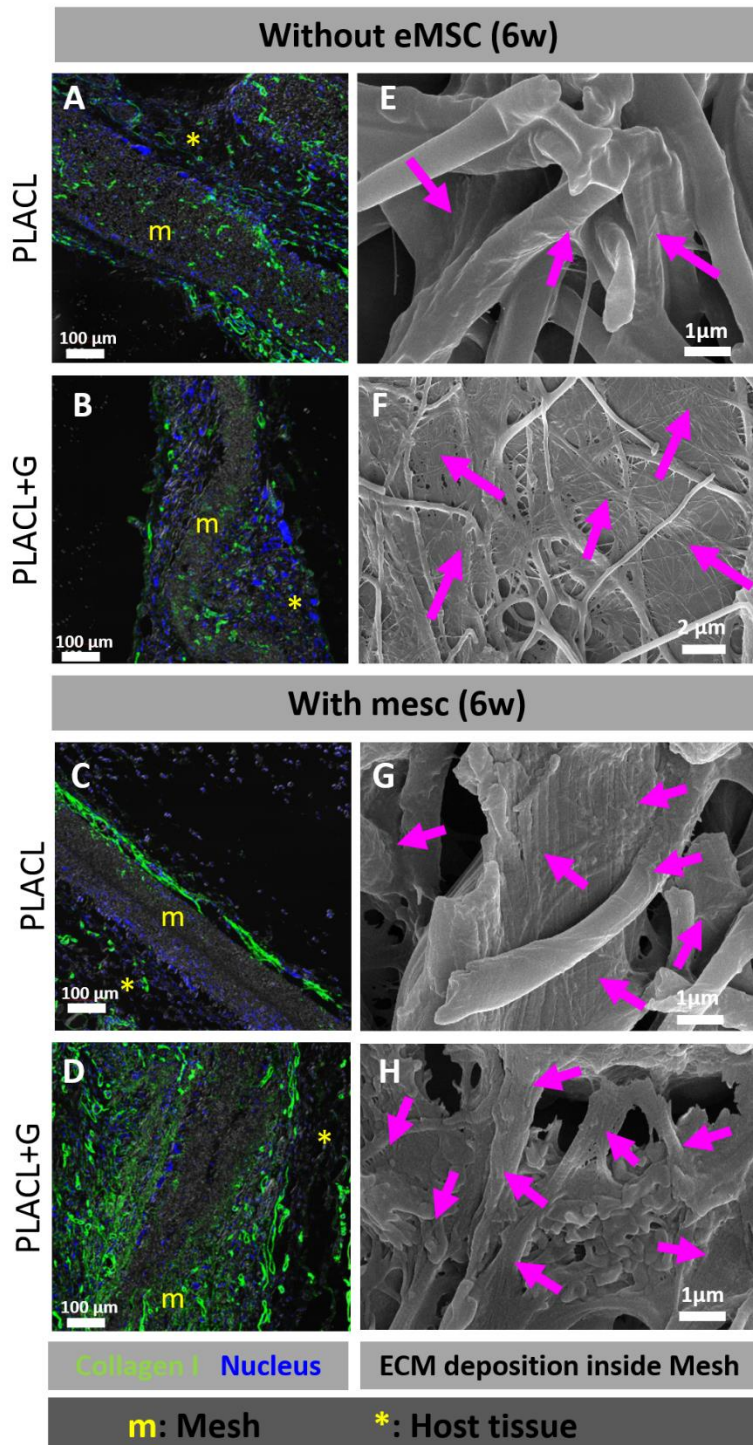

**Figure S7: Collagen Deposition and ECM formation on nanofiber mesh-eMSC constructs *in vivo* at 6 weeks.** (A-D) immunofluorescence showing Collagen I (green) in and around meshes (E-H) SEM micrographs detailing Collagen structures in the deposited matrix (pink arrows) on nanofibers inside meshes.

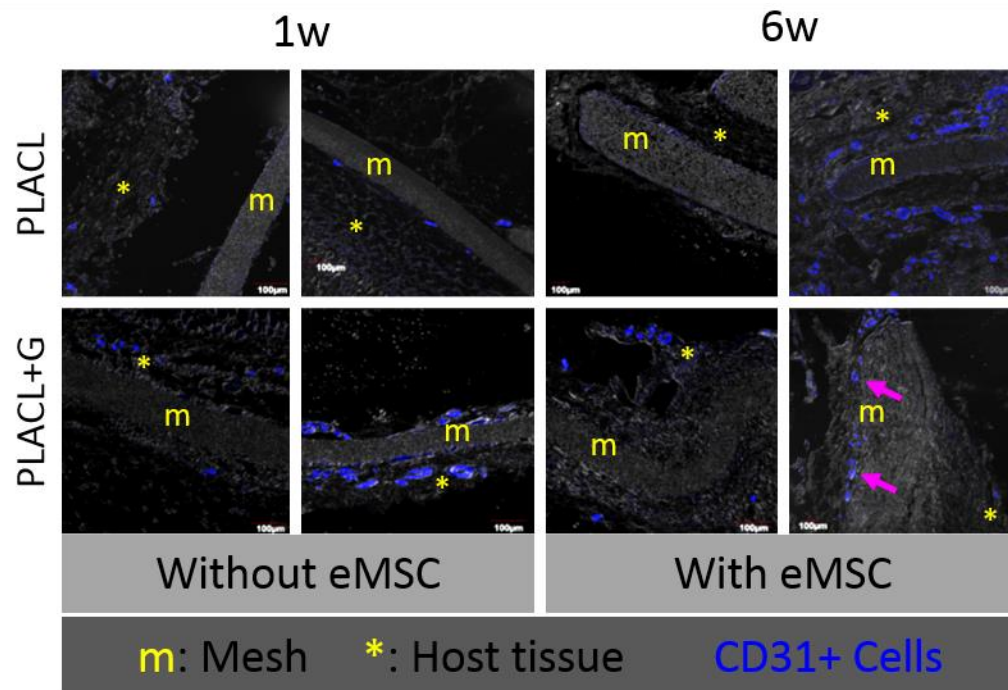

**Figure S8: Neovascularization of nanofiber mesh-eMSC constructs.** Immunofluorescence of CD31<sup>+</sup> endothelial cells (blue) in vivo in and around implanted meshes at 1 week and 6 weeks. Only PLACL+G+eMSC at 6 weeks shows CD31<sup>+</sup> cells inside the mesh area (pink arrow).
